# Supplementary material for: Development and Evaluation of Bacteriophage Cocktail to Eradicate Biofilms Formed by an Extensively Drug-Resistant (XDR) Pseudomonas aeruginosa
Source: MDPI journal article supplement (doi:10.3390/v15020427), 2023-02-02
Supplement: s1 [file s1]

# Title: Development and Evaluation of Bacteriophage Cocktail to Eradicate Biofilms Formed by an Extensively Drug-Resistant (XDR) *Pseudomonas aeruginosa*

Authors: Medhavi Vashisth <sup>1,2</sup>, Anu Bala Jaglan <sup>1,3</sup>, Shikha Yashveer <sup>2</sup>, Priya Sharma <sup>1</sup>, Priyanka Bardajaty <sup>1</sup>, Nitin Virmani <sup>1</sup>, Bidhan Chand Bera <sup>1</sup>, Rajesh Kumar Vaid <sup>1</sup> and Taruna Anand <sup>1,\*</sup>

Supplementary material for the article: The material has been provided in the order of appearance of the reference in the text.

**Supplementary Table S1:** Details of the bacterial strains used for bacteriophage isolation and characterization.

| Sr. No. | NCVTC/ MTCC/ATCC -Accession no./ Lab ID | Bacterial strain              | Source of isolation  |
|---------|-----------------------------------------|-------------------------------|----------------------|
| 1       | VTCCBAA237                              | <i>Pseudomonas aeruginosa</i> | Gangrenous Mastitis  |
| 2       | VTCCBAA238                              | <i>Pseudomonas aeruginosa</i> | Canine faecal Swab   |
| 3       | VTCCBAA239                              | <i>Pseudomonas aeruginosa</i> | Hog Deer Nasal Swab  |
| 4       | VTCCBAA325                              | <i>Pseudomonas aeruginosa</i> | Sheep Lung           |
| 5       | VTCCBAA333                              | <i>Pseudomonas aeruginosa</i> | Camel                |
| 6       | VTCCBAA563                              | <i>Pseudomonas aeruginosa</i> | Sheep                |
| 7       | VTCCBAA574                              | <i>Pseudomonas aeruginosa</i> | Dog                  |
| 8       | VTCCBAA632                              | <i>Pseudomonas species</i>    | Bovine cervical swab |
| 9       | VTCCBAA785                              | <i>Pseudomonas aeruginosa</i> | Sheep                |
| 10      | VTCCBAA789                              | <i>Pseudomonas aeruginosa</i> | Canine pus from ear  |

|    |               |                               |                              |
|----|---------------|-------------------------------|------------------------------|
| 11 | VTCCBAA843    | <i>Pseudomonas aeruginosa</i> | Turtle cloaca                |
| 12 | VTCCBAA844    | <i>Pseudomonas aeruginosa</i> | Mastitis                     |
| 13 | VTCCBAA845    | <i>Pseudomonas aeruginosa</i> | Canine                       |
| 14 | VTCCBAA846    | <i>Pseudomonas aeruginosa</i> | Human/Urine                  |
| 15 | VTCCBAA848    | <i>Pseudomonas aeruginosa</i> | Canine gingival swab         |
| 16 | VTCCBAA849    | <i>Pseudomonas aeruginosa</i> | Canine                       |
| 17 | VTCCBAA951    | <i>Pseudomonas species</i>    | Sheep liver tissue           |
| 18 | VTCCBAA956    | <i>Pseudomonas aeruginosa</i> | Cattle milk from mastitis    |
| 19 | VTCCBAA1047   | <i>Pseudomonas aeruginosa</i> | Human/pus swab               |
| 20 | VTCCBAA1057   | <i>Pseudomonas aeruginosa</i> | Milk sample of bovine        |
| 21 | VTCCBAA1061   | <i>Pseudomonas aeruginosa</i> | Canine ear swab              |
| 22 | VTCCBAA1096   | <i>Pseudomonas aeruginosa</i> | Sheep Lung swab              |
| 23 | VTCCBAA1097   | <i>Pseudomonas aeruginosa</i> | Goat lung swab               |
| 24 | VTCCBAA1216   | <i>Pseudomonas aeruginosa</i> | Cattle faecal matter         |
| 25 | RR/ 2021/ 112 | <i>Pseudomonas aeruginosa</i> | Buffalo milk                 |
| 26 | Fop 416A      | <i>Pseudomonas aeruginosa</i> | Community sewage             |
| 27 | Fop 426A      | <i>Pseudomonas aeruginosa</i> | Sewage water                 |
| 28 | Fop 489B      | <i>Pseudomonas aeruginosa</i> | Biohazard waste, Dental ward |
| 29 | Fop 507C      | <i>Pseudomonas aeruginosa</i> | Human urine                  |

**Supplementary Table S2:** Efficiency of plating (EOP) of *P. aeruginosa* phages against different *Pseudomonas* strains.

| Bacteriophage                     | $\phi$ PA170 |              | $\phi$ PA172 |              | $\phi$ PA173 |              | $\phi$ PA176 |              |
|-----------------------------------|--------------|--------------|--------------|--------------|--------------|--------------|--------------|--------------|
| <i>Pseudomonas</i> strains (n=29) | EOP value    | Productivity |
| VTCCBAA237                        | 0.007        | Low          | 0.008        | Low          | 0.000085     | Inefficient  | 0.61         | High         |
| VTCCBAA238                        | 0.06         | Low          | 0.004        | Low          | 0.000005     | Inefficient  | 0.68         | High         |
| VTCCBAA239                        | -            | -            | -            | -            | -            | -            | -            | -            |
| VTCCBAA325                        | 0.0002       | Inefficient  | 0.0005       | Inefficient  | 0            | Inefficient  | 0.58         | High         |
| VTCCBAA333                        | 0.0006       | Inefficient  | 1E-07        | Inefficient  | 0.0046       | Low          | 0.81         | High         |
| VTCCBAA563                        | 0.000002     | Inefficient  | -            | -            | -            | -            | -            | -            |
| VTCCBAA574                        | 0.72         | High         | 0.85         | High         | 4.2E-06      | Inefficient  | 0.51         | High         |
| VTCCBAA632                        | 0.85         | High         | 0.72         | High         | -            | -            | 0.68         | High         |
| VTCCBAA785                        | 0.12         | Medium       | 0.00095      | Inefficient  | 3.3E-06      | Inefficient  | 0.85         | High         |
| VTCCBAA789                        | 0.11         | Medium       | -            | -            | 0.0062       | Inefficient  | 0.27         | Medium       |
| VTCCBAA843                        | 0.006        | Low          | 0.00016      | Inefficient  | 8.9E-07      | Inefficient  | 0.81         | High         |
| VTCCBAA844                        | 0.03         | Low          | 0.00029      | Inefficient  | 0.16         | Medium       | 0.37         | Medium       |
| VTCCBAA845                        | 0.00081      | Inefficient  | 0.0107       | Low          | -            | -            | 0.61         | High         |
| VTCCBAA846                        | 0.25         | Medium       | 0.029        | Low          | 0.00125      | Low          | 0.58         | High         |
| VTCCBAA848                        | 0.93         | High         | 0.0072       | Low          | 1.42E-06     | Inefficient  | 0.71         | High         |
| VTCCBAA849                        | 0.56         | High         | 0.64         | High         | 2.5E-06      | Inefficient  | 0.85         | High         |
| VTCCBAA951                        | -            | -            | -            | -            | -            | -            | -            | -            |
| VTCCBAA956                        | 0.015        | Low          | 0.000079     | Inefficient  | 0.000107     | Inefficient  | 0.0126       | Low          |
| VTCCBAA1047                       | 0.06         | Low          | 0.0059       | Low          | 0.00125      | Low          | 0            | Inefficient  |
| VTCCBAA1057                       | 0.00012      | Inefficient  | 0.0057       | Low          | 5.3E-06      | Inefficient  | 0.0064       | Low          |
| VTCCBAA1061                       | 0.15         | Medium       | 0.0073       | Low          | 0.000037     | Inefficient  | 0.00133      | Low          |
| VTCCBAA1096                       | 2.7E-06      | Inefficient  | 0.0029       | Low          | 2.6E-06      | Inefficient  | 0.0014       | Low          |

|             |        |             |         |             |         |             |          |             |
|-------------|--------|-------------|---------|-------------|---------|-------------|----------|-------------|
| VTCCBAA1097 | 0.56   | High        | -       | -           | 6E-07   | Inefficient | 0.98     | High        |
| VTCCBAA1216 | -      | -           | -       | -           | -       | -           | -        | -           |
| RR/2021/112 | 0.81   | High        | 0.33    | Medium      | 1.6E-06 | Inefficient | 0.66     | High        |
| Fop416A     | 1      | High        | 1       | High        | 1       | High        | 1        | High        |
| Fop426A     | 0.0003 | Inefficient | 0.00034 | Inefficient | -       | -           | 2.73E-05 | Inefficient |
| Fop489B     | 0.089  | Low         | 0.0002  | Inefficient | -       | -           | 0.109    | Medium      |
| Fop507C     | -      | -           | 0.00076 | Inefficient | -       | -           | -        | -           |

| Bacteriophage                     | $\phi$ PA177 |              | $\phi$ PA178 |              | $\phi$ PA180 |              |
|-----------------------------------|--------------|--------------|--------------|--------------|--------------|--------------|
| <i>Pseudomonas</i> strains (n=29) | EOP value    | Productivity | EOP value    | Productivity | EOP value    | Productivity |
| VTCCBAA237                        | 0.74         | High         | 0.0391       | Low          | 0.78         | High         |
| VTCCBAA238                        | 0.024        | Low          | 0.026        | Low          | 0.85         | High         |
| VTCCBAA239                        | -            | -            | -            | -            | -            | -            |
| VTCCBAA325                        | 0.56         | High         | 0.2          | Medium       | 0.57         | High         |
| VTCCBAA333                        | 0.7          | High         | 0.02         | Low          | 0.78         | High         |
| VTCCBAA563                        | -            | -            | -            | -            | 0.17         | Medium       |
| VTCCBAA574                        | -            | -            | -            | -            | 1.14         | High         |
| VTCCBAA632                        | 0.81         | High         | -            | -            | 0.85         | High         |
| VTCCBAA785                        | 0.041        | Low          | 3.91E-07     | Inefficient  | 0.025        | Low          |
| VTCCBAA789                        | 0.029        | Low          | 0.023        | Low          | 1.28         | High         |
| VTCCBAA843                        | 0.017        | Low          | 1.56E-08     | Inefficient  | 0.42         | Medium       |
| VTCCBAA844                        | 0.0046       | Low          | 0.0126       | Low          | 0.92         | High         |
| VTCCBAA845                        | 0.5          | High         | 2.17E-05     | Inefficient  | 0.57         | High         |
| VTCCBAA846                        | 0.065        | Low          | 1.39E-07     | Inefficient  | 0.135        | Medium       |
| VTCCBAA848                        | 0.83         | High         | 3E-07        | Inefficient  | 0.57         | High         |
| VTCCBAA849                        | 0.048        | Low          | 9.1E-07      | Inefficient  | 1            | High         |
| VTCCBAA951                        | -            | -            | -            | -            | -            | -            |
| VTCCBAA956                        | -            | -            | -            | -            | -            | -            |

|                    |         |             |          |             |       |        |
|--------------------|---------|-------------|----------|-------------|-------|--------|
| <b>VTCCBAA1047</b> | 0.0058  | Low         | 2.6E-07  | Inefficient | 0.78  | High   |
| <b>VTCCBAA1057</b> | 0.00037 | Inefficient | 1.04E-05 | Inefficient | 0.185 | Medium |
| <b>VTCCBAA1061</b> | 0.069   | Low         | 5.2E-10  | Inefficient | 0.607 | High   |
| <b>VTCCBAA1096</b> | -       | -           | -        | -           | 0.71  | High   |
| <b>VTCCBAA1097</b> | 0.081   | Low         | 0.0173   | Low         | 0.78  | High   |
| <b>VTCCBAA1216</b> | -       | -           | -        | -           | -     | -      |
| <b>RR/2021/112</b> | 2       | Low         | 0.78     | High        | -     | -      |
| <b>Fop416A</b>     | 1       | High        | 1        | High        | 0.85  | High   |
| <b>Fop426A</b>     | 8.1E-07 | Inefficient | -        | -           | 1     | High   |
| <b>Fop489B</b>     | -       | -           | -        | -           | -     | -      |
| <b>Fop507C</b>     | -       | -           | -        | -           | -     | -      |

Interpretation for Phage productivity on the basis of EOP values:

High productivity > 0.5

Medium productivity 0.5 - 0.1

Low productivity 0.001 - 0.1

Inefficient productivity < 0.001

EOP values of bacteriophages on their respective original hosts are highlighted in yellow.

Blank cells represent absence of bacteriophage lytic activity

**Supplementary Table S3.** Antibiogram of *Pseudomonas* strains.

[illegible]

[illegible]

\* indicates 2 *Pseudomonas* sp. and remaining 27 strains are *P. aeruginosa*; R - Resistant, I - Intermediately Resistant, S - Susceptible, MDR - Multiple drug resistant, XDR - Extensively drug resistant. Antibiotics are abbreviated as: PI100- Penicillin 100µg, AT30- Aztreonam 30µg, CAZ30- Ceftazidime 30µg, CPM30- Cefepime 30µg, CTX30- Cefotaxime 30µg, CEP30- Cephalothin 30µg, CAC 30/10- Ceftazidime-clavulanic acid 30/10µg, CEC30/10- Cefotaxime-clavulanic acid 30/10µg, IPM10- Imipenem 10µg, MRP10- Meropenem 10µg, CL10- Colistin 10µg, PB300- Polymyxin 300U, CIP5- Ciprofloxacin 5µg, LE5- Levofloxacin 5µg, NX10- Norfloxacin 10µg, OF5- Ofloxacin 5µg, AK30- Amikacin 30µg, GEN10- Gentamicin 10µg, TOB10- Tobramycin 10µg, AZM10- Azithromycin 10µg.

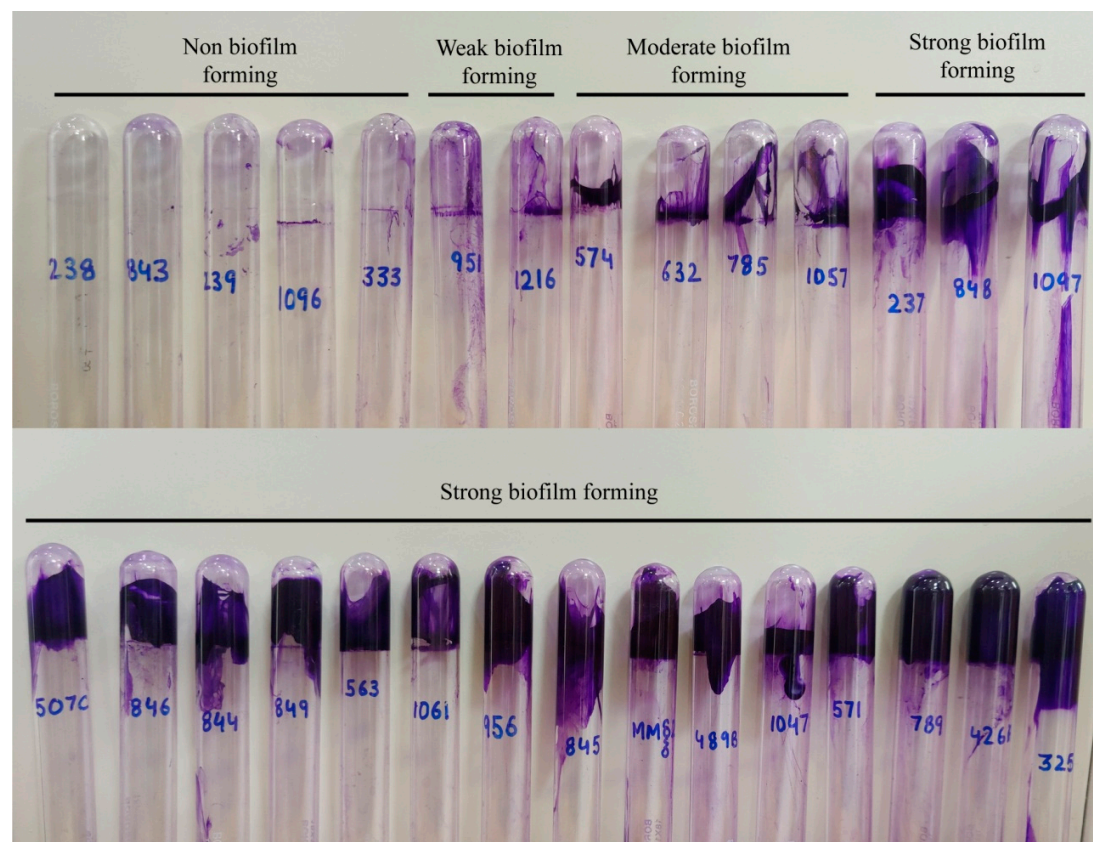

**Supplementary Figure S1:** Biofilm formation ability of *Pseudomonas* strains (qualitative measurement by crystal violet staining using tube method).



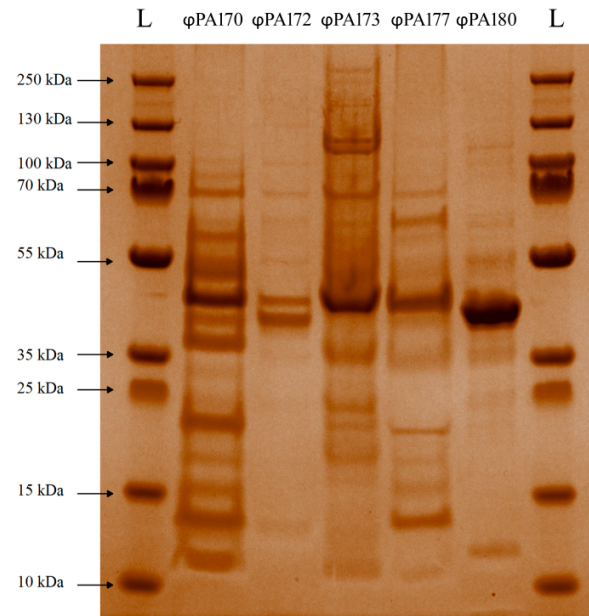

**Supplementary Figure S2:** SDS- Polyacrylamide Gel Electrophoresis of phages *viz.*  $\phi$ PA170,  $\phi$ PA172,  $\phi$ PA173,  $\phi$ PA177, and  $\phi$ PA180. The samples were prepared using manufacturer's protocol. Briefly, 20 $\mu$ l of the phage ( $1 \times 10^{10}$  PFU/ml) was mixed with 15 $\mu$ l NuPAGE LDS Sample Buffer (4X), and 6 $\mu$ l of sample reducing agent and were heated for 15 minutes at 90°C in a dry bath. The samples were cooled to room temperature and were loaded into the wells of the NuPAGE 4-12% bis-tris gels and were electrophoresed at 80V for 3 hr till the bands of the protein marker were separated. The gel was then stained using Simply Blue Safe Stain (Invitrogen) for 1 hr on a gel rocker and was de-stained using distilled water and visualized in BioRad Gel Doc XR+ Gel Documentation System (BioRad, USA). Structural protein size was determined by comparing with PageRuler™ Plus Prestained Protein Ladder (26619), (Thermo Scientific) as standard using Image Lab software using (Bio Rad).
